# Supplementary material for: The Occurrence of Putative Nitric Oxide Dismutase (Nod) in an Alpine Wetland with a New Dominant Subcluster and the Potential Ability for a Methane Sink
Source: Hindawi journal article supplement (doi:10.1155/2018/6201541), 2018-11-08

**The occurrence of putative nitric oxide dismutase (Nod) in an alpine wetland with a new dominant sub-cluster and the potential ability for a methane sink**

**Yanfen Zhang<sup>a,b</sup>, Anzhou Ma<sup>a,b</sup>, Wenzong Liu<sup>a,b</sup>, Zihui Bai<sup>a,b</sup>, Xuliang Zhuang<sup>a,b</sup>, Guoqiang Zhuang<sup>a,b\*</sup>**

<sup>a</sup> Key Laboratory of Environmental Biotechnology, Research Center for Eco-Environmental Sciences, Chinese Academy of Sciences, Beijing 100085, China

<sup>b</sup> University of Chinese Academy of Sciences, Beijing 100049, China

Correspondence should be addressed to Guoqiang Zhuang, gqzhuang@rcees.ac.cn

Figure S1: Rarefaction curve for the *nod* gene library in this study.

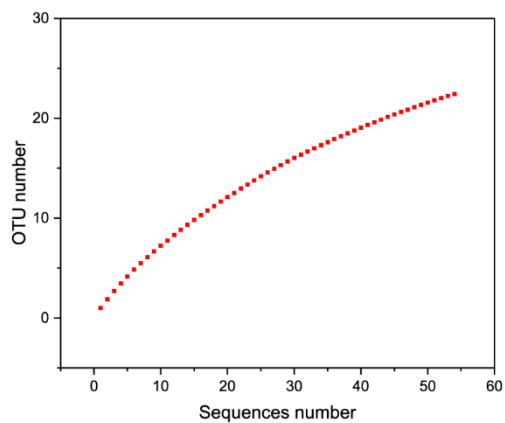

Supplement: f1 [file 6201541.f1.pdf]
